# Supplementary material
Source: publisher site journal article supplement (https://www.dovepress.com/article/479171)
Supplement: Supplementary file 1 [file get_supplementary_file.php]

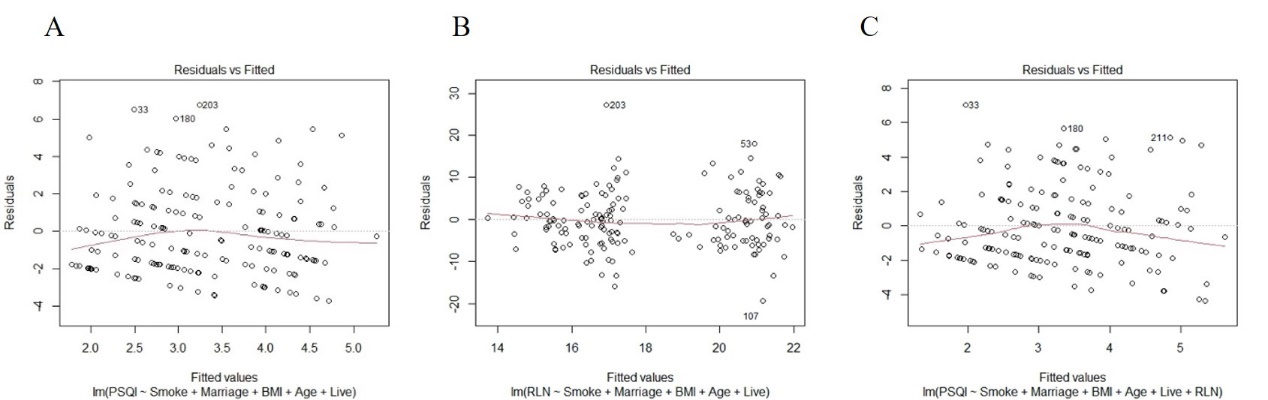


**Supplementary Figure 1**: Linear relationship in three models of linear regression.

**Notes:**

The linear relationship test of the three linear regression models. (A: model 1, B: model 2, C: model 3)


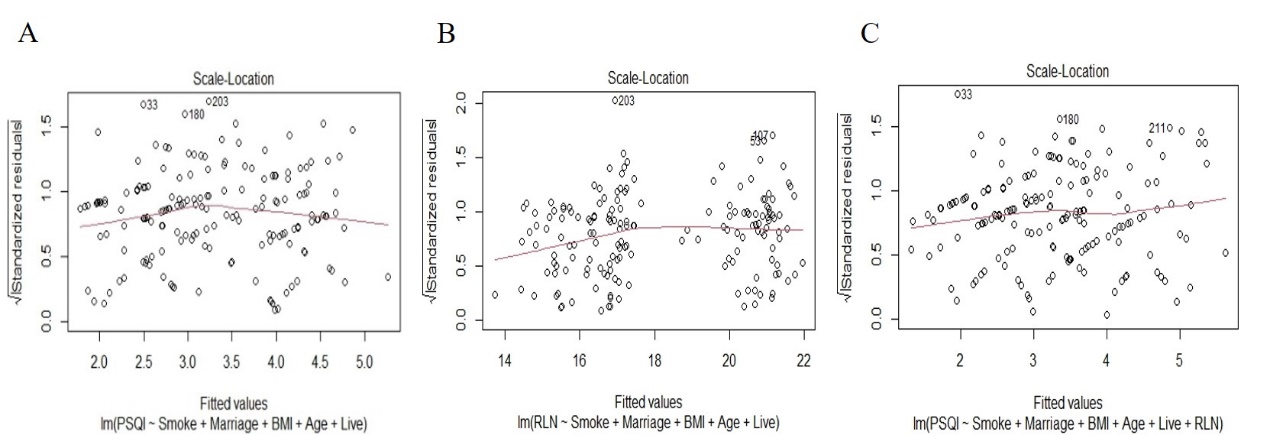


**Supplementary Figure 2:** Homogeneity of variance in three models of linear regression.

**Notes:**

The homogeneity of variance test of the three linear regression models. (A: model 1, B: model 2, C: model 3)
